# Supplementary material
Source: publisher figshare collection journal article supplement (https://acs.figshare.com/ndownloader/files/4701136)
Supplement: Supplementary file 1 [file 4701136]

data_24314_LIJ_publ

_pd_block_id
  2006-12-29T15:03|24314_LIJ|El'ad_Caspi|Overall

_audit_creation_method  "from EXP file using GSAS2CIF"
_audit_creation_date                   2006-12-29T15:03
_audit_author_name                     "El'ad Caspi"
_audit_update_record
; 2006-12-29T15:03  Initial CIF as created by GSAS2CIF
;

#=============================================================================
# this information describes the project, paper etc. for the CIF             #
# Acta Cryst. Section C papers and editorial correspondence is generated     #
# from the information in this section                                       #
#                                                                            #
#   (from)   CIF submission form for Rietveld refinements (Acta Cryst. C)    #
#                                                 Version 14 December 1998   #
#=============================================================================
# 1. SUBMISSION DETAILS

_publ_contact_author_name            ?   # Name of author for correspondence
_publ_contact_author_address             # Address of author for correspondence
; ?
;
_publ_contact_author_email           ?
_publ_contact_author_fax             ?
_publ_contact_author_phone           ?

_publ_contact_letter
; ?
;

_publ_requested_journal              ?
_publ_requested_coeditor_name        ?
_publ_requested_category             ?   # Acta C: one of CI/CM/CO/FI/FM/FO

#==============================================================================

# 2. PROCESSING SUMMARY (IUCr Office Use Only)

_journal_data_validation_number      ?

_journal_date_recd_electronic        ?
_journal_date_to_coeditor            ?
_journal_date_from_coeditor          ?
_journal_date_accepted               ?
_journal_date_printers_first         ?
_journal_date_printers_final         ?
_journal_date_proofs_out             ?
_journal_date_proofs_in              ?
_journal_coeditor_name               ?
_journal_coeditor_code               ?
_journal_coeditor_notes
; ?
;
_journal_techeditor_code             ?
_journal_techeditor_notes
; ?
;
_journal_coden_ASTM                  ?
_journal_name_full                   ?
_journal_year                        ?
_journal_volume                      ?
_journal_issue                       ?
_journal_page_first                  ?
_journal_page_last                   ?
_journal_paper_category              ?
_journal_suppl_publ_number           ?
_journal_suppl_publ_pages            ?

#==============================================================================

# 3. TITLE AND AUTHOR LIST

_publ_section_title
; ?
;
_publ_section_title_footnote
; ?
;

# The loop structure below should contain the names and addresses of all
# authors, in the required order of publication. Repeat as necessary.

loop_
	_publ_author_name
        _publ_author_footnote
	_publ_author_address
 ?                                   #<--'Last name, first name'
; ?
;
; ?
;

#==============================================================================

# 4. TEXT

_publ_section_synopsis
;  ?
;
_publ_section_abstract
; ?
;
_publ_section_comment
; ?
;
_publ_section_exptl_prep      # Details of the preparation of the sample(s)
                              # should be given here.
; ?
;
_publ_section_exptl_refinement
; ?
;
_publ_section_references
; ?
;
_publ_section_figure_captions
; ?
;
_publ_section_acknowledgements
; ?
;

#=============================================================================
# 5. OVERALL REFINEMENT & COMPUTING DETAILS

_refine_special_details
; ?
;
_pd_proc_ls_special_details
; ?
;

# The following items are used to identify the programs used.
_computing_molecular_graphics     ?
_computing_publication_material   ?

_refine_ls_weighting_scheme       ?
_refine_ls_weighting_details      ?
_refine_ls_hydrogen_treatment     ?
_refine_ls_extinction_method      ?
_refine_ls_extinction_coef        ?
_refine_ls_number_constraints     ?

_refine_ls_restrained_S_all       ?
_refine_ls_restrained_S_obs       ?

#==============================================================================
# 6. SAMPLE PREPARATION DATA

# (In the unusual case where multiple samples are used in a single
#  Rietveld study, this information should be moved into the phase
#  blocks)

# The following three fields describe the preparation of the material.
# The cooling rate is in K/min.  The pressure at which the sample was
# prepared is in kPa.  The temperature of preparation is in K.

_pd_prep_cool_rate                ?
_pd_prep_pressure                 ?
_pd_prep_temperature              ?

_pd_char_colour                   ?       # use ICDD colour descriptions
data_24314_LIJ_overall

_refine_ls_shift/su_max                0.04
_refine_ls_shift/su_mean               0.01
_computing_structure_refinement        GSAS
_refine_ls_number_parameters           58
_refine_ls_goodness_of_fit_all         1.19
_refine_ls_number_restraints           0
_refine_ls_matrix_type                 full

# pointers to the phase blocks
loop_   _pd_phase_block_id
      2006-12-29T15:03|24314_LIJ_phase1|El'ad_Caspi||
      2006-12-29T15:03|24314_LIJ_phase2|El'ad_Caspi||
# pointers to the diffraction patterns
loop_   _pd_block_diffractogram_id
      2006-12-29T15:03|24314_LIJ_H_01|El'ad_Caspi|SEPD

# Information for phase 1
data_24314_LIJ_phase_1

_pd_block_id
  2006-12-29T15:03|24314_LIJ_phase1|El'ad_Caspi||

# Histograms for phase 1
loop_   _pd_block_diffractogram_id
  2006-12-29T15:03|24314_LIJ_H_01|El'ad_Caspi|SEPD

#==============================================================================
# 7. CHEMICAL, STRUCTURAL AND CRYSTAL DATA

_pd_char_particle_morphology      ?

_chemical_name_systematic
; ?
;
_chemical_name_common             ?
_chemical_formula_moiety          ?
_chemical_formula_structural      ?
_chemical_formula_analytical      ?
_chemical_melting_point           ?
_chemical_compound_source         ?       # for minerals and
                                          # natural products
_symmetry_space_group_name_Hall   ?

_exptl_crystal_F_000               ?
_exptl_crystal_density_diffrn      ?
_exptl_crystal_density_meas        ?
_exptl_crystal_density_method      ?

_cell_measurement_temperature     ?

_cell_special_details
; ?
;

_geom_special_details             ?

# The following item identifies the program(s) used (if appropriate).
_computing_structure_solution     ?

#==============================================================================

# 8. Phase information from GSAS

_pd_phase_name                         CaCO3
_cell_length_a                         4.96524(6)
_cell_length_b                         7.96358(10)
_cell_length_c                         5.74840(5)
_cell_angle_alpha                      90.0
_cell_angle_beta                       90.0
_cell_angle_gamma                      90.0
_cell_volume                           227.2980(30)
_symmetry_cell_setting                 orthorhombic
_symmetry_space_group_name_H-M         "P m c n"
loop_ _symmetry_equiv_pos_site_id _symmetry_equiv_pos_as_xyz
       1 +x,+y,+z 
       2 -x+1/2,+y,+z 
       3 +x,-y+1/2,+z+1/2 
       4 -x+1/2,-y+1/2,+z+1/2 
      -1 -x,-y,-z 
      -2 +x+1/2,-y,-z 
      -3 -x,+y+1/2,-z+1/2 
      -4 +x+1/2,+y+1/2,-z+1/2 

# ATOMIC COORDINATES AND DISPLACEMENT PARAMETERS


loop_
      _atom_site_type_symbol
      _atom_site_label
      _atom_site_fract_x
      _atom_site_fract_y
      _atom_site_fract_z
      _atom_site_occupancy
      _atom_site_thermal_displace_type
      _atom_site_U_iso_or_equiv
      _atom_site_symmetry_multiplicity
Ca
Ca      0.25         0.41507(20)  0.76072(28)  1.0        Uani   0.00903       4
C 
C       0.25         0.76200(11) -0.08489(20)  1.0        Uani   0.0066        4
O 
O1      0.25         0.92261(14) -0.09420(26)  1.0        Uani   0.01198       4
O 
O2      0.47325(16)  0.68120(10) -0.08710(21)  1.0        Uani   0.01049       8

loop_ _atom_site_aniso_label
      _atom_site_aniso_U_11
      _atom_site_aniso_U_12
      _atom_site_aniso_U_13
      _atom_site_aniso_U_22
      _atom_site_aniso_U_23
      _atom_site_aniso_U_33
Ca      0.0103(7)   0.0         0.0         0.0111(8)   0.0023(5)   0.0057(7) 
C       0.0063(4)   0.0         0.0         0.0068(4)  -0.0001(5)   0.0066(5) 
O1      0.0199(8)   0.0         0.0         0.0050(5)   0.0002(5)   0.0110(6) 
O2      0.0082(4)   0.00309(29) -0.0006(4)   0.0123(4)   0.0018(4)   0.0110(4) 

loop_ _atom_type_symbol
      _atom_type_number_in_cell
                   Ca  4.0        
                   C   4.0        
                   O  12.0        
 
# If you change Z, be sure to change all 3 of the following
_chemical_formula_sum                  "C Ca O3"
_chemical_formula_weight               100.09
_cell_formula_units_Z                  4

# MOLECULAR GEOMETRY

loop_
      _geom_bond_atom_site_label_1
      _geom_bond_atom_site_label_2
      _geom_bond_distance
      _geom_bond_site_symmetry_1
      _geom_bond_site_symmetry_2
      _geom_bond_publ_flag
  Ca        Ca              3.8953(22)  .      3_554  N
  Ca        Ca              3.8953(22)  .      3_555  N
  Ca        Ca              4.1204(25)  .     -1_566  N
  Ca        Ca              3.9448(26)  .     -1_567  N
  Ca        Ca              4.1204(25)  .     -1_666  N
  Ca        Ca              3.9448(26)  .     -1_667  N
  Ca        C               2.9018(19)  .      1_556  N
  Ca        C               3.2497(19)  .      3_565  N
  Ca        C               2.9446(10)  .     -3_545  N
  Ca        C               2.9446(10)  .     -3_645  N
  Ca        O1              2.4152(19)  .      3_565  N
  Ca        O1               2.6614(9)  .     -3_545  N
  Ca        O1               2.6614(9)  .     -3_645  N
  Ca        O2              2.5467(17)  .      1_556  N
  Ca        O2              2.5467(17)  .      2_556  N
  Ca        O2              2.4487(17)  .     -1_666  N
  Ca        O2              2.4487(17)  .     -2_466  N
  Ca        O2              2.5205(17)  .     -3_645  N
  Ca        O2              2.5205(17)  .     -4_445  N
  C         Ca              2.9018(19)  .      1_554  N
  C         Ca              3.2497(19)  .      3_564  N
  C         Ca              2.9446(10)  .     -3_555  N
  C         Ca              2.9446(10)  .     -3_655  N
  C         O1              1.2802(14)  .      1_555  N
  C         O2               1.2818(9)  .      1_555  N
  C         O2               1.2818(9)  .      2_555  N
  O1        Ca              2.4152(19)  .      3_564  N
  O1        Ca               2.6614(9)  .     -3_555  N
  O1        Ca               2.6614(9)  .     -3_655  N
  O1        C               1.2802(14)  .      1_555  N
  O2        Ca              2.5467(17)  .      1_554  N
  O2        Ca              2.4487(17)  .     -1_666  N
  O2        Ca              2.5205(17)  .     -3_655  N
  O2        C                1.2818(9)  .      1_555  N

loop_
      _geom_angle_atom_site_label_1
      _geom_angle_atom_site_label_2
      _geom_angle_atom_site_label_3
      _geom_angle
      _geom_angle_site_symmetry_1
      _geom_angle_site_symmetry_2
      _geom_angle_site_symmetry_3
      _geom_angle_publ_flag
  Ca        Ca        Ca                95.10(7)      3_554  .      3_555  N
  Ca        Ca        O1              74.808(34)      3_554  .      3_565  N
  Ca        Ca        O1                75.51(4)      3_554  .     -3_445  N
  Ca        Ca        O1                75.51(4)      3_554  .     -3_545  N
  Ca        Ca        O2               144.60(5)      3_554  .      1_556  N
  Ca        Ca        O2               144.60(5)      3_554  .      2_556  N
  Ca        Ca        O2               110.73(7)      3_554  .     -1_666  N
  Ca        Ca        O2               110.73(7)      3_554  .     -2_566  N
  Ca        Ca        O2                37.73(4)      3_554  .     -3_656  N
  Ca        Ca        O2                37.73(4)      3_554  .     -4_556  N
  Ca        Ca        O1               169.91(8)      3_555  .      3_565  N
  Ca        Ca        O1               106.30(5)      3_555  .     -3_445  N
  Ca        Ca        O1               106.30(5)      3_555  .     -3_545  N
  Ca        Ca        O2               107.95(4)      3_555  .      1_556  N
  Ca        Ca        O2               107.95(4)      3_555  .      2_556  N
  Ca        Ca        O2              39.043(24)      3_555  .     -1_666  N
  Ca        Ca        O2              39.043(24)      3_555  .     -2_566  N
  Ca        Ca        O2                78.08(6)      3_555  .     -3_656  N
  Ca        Ca        O2                78.08(6)      3_555  .     -4_556  N
  O1        Ca        O1                71.59(5)      3_565  .     -3_445  N
  O1        Ca        O1                71.59(5)      3_565  .     -3_545  N
  O1        Ca        O2                81.07(6)      3_565  .      1_556  N
  O1        Ca        O2                81.07(6)      3_565  .      2_556  N
  O1        Ca        O2             144.567(35)      3_565  .     -1_666  N
  O1        Ca        O2             144.567(35)      3_565  .     -2_566  N
  O1        Ca        O2                93.50(6)      3_565  .     -3_656  N
  O1        Ca        O2                93.50(6)      3_565  .     -4_556  N
  O1        Ca        O1              137.75(10)     -3_445  .     -3_545  N
  O1        Ca        O2               120.72(6)     -3_556  .      1_556  N
  O1        Ca        O2                72.47(4)     -3_556  .      2_556  N
  O1        Ca        O2               143.72(7)     -3_556  .     -1_666  N
  O1        Ca        O2                76.07(4)     -3_556  .     -2_566  N
  O1        Ca        O2               112.51(7)     -3_556  .     -3_656  N
  O1        Ca        O2              50.633(35)     -3_556  .     -4_556  N
  O1        Ca        O2                72.47(4)     -3_656  .      1_556  N
  O1        Ca        O2               120.72(6)     -3_656  .      2_556  N
  O1        Ca        O2                76.07(4)     -3_656  .     -1_666  N
  O1        Ca        O2               143.72(7)     -3_656  .     -2_566  N
  O1        Ca        O2              50.633(35)     -3_656  .     -3_656  N
  O1        Ca        O2               112.51(7)     -3_656  .     -4_556  N
  O2        Ca        O2                51.60(5)      1_556  .      2_556  N
  O2        Ca        O2                75.71(5)      1_556  .     -1_666  N
  O2        Ca        O2               103.98(6)      1_556  .     -2_566  N
  O2        Ca        O2             120.906(14)      1_556  .     -3_656  N
  O2        Ca        O2               171.20(6)      1_556  .     -4_556  N
  O2        Ca        O2               103.98(6)      2_556  .     -1_666  N
  O2        Ca        O2                75.71(5)      2_556  .     -2_566  N
  O2        Ca        O2               171.20(6)      2_556  .     -3_656  N
  O2        Ca        O2             120.906(14)      2_556  .     -4_556  N
  O2        Ca        O2                68.27(6)     -1_666  .     -2_566  N
  O2        Ca        O2                76.47(4)     -1_666  .     -3_656  N
  O2        Ca        O2               112.21(6)     -1_666  .     -4_556  N
  O2        Ca        O2               112.21(6)     -2_566  .     -3_656  N
  O2        Ca        O2                76.47(4)     -2_566  .     -4_556  N
  O2        Ca        O2                66.07(5)     -3_656  .     -4_556  N
  O1        C         O2               120.07(6)      1_555  .      1_555  N
  O1        C         O2               120.07(6)      1_555  .      2_555  N
  O2        C         O2              119.72(11)      1_555  .      2_555  N
  Ca        O1        Ca               108.41(5)      3_564  .     -3_466  N
  Ca        O1        Ca               108.41(5)      3_564  .     -3_566  N
  Ca        O1        C               119.96(11)      3_564  .      1_555  N
  Ca        O1        Ca              137.75(10)     -3_466  .     -3_566  N
  Ca        O1        C                 89.57(5)     -3_555  .      1_555  N
  Ca        O1        C                 89.57(5)     -3_655  .      1_555  N
  Ca        O2        Ca               104.29(5)      1_554  .     -1_666  N
  Ca        O2        Ca               135.74(5)      1_554  .     -3_566  N
  Ca        O2        C                 92.56(7)      1_554  .      1_555  N
  Ca        O2        Ca               103.23(5)     -1_666  .     -3_566  N
  Ca        O2        C               129.41(12)     -1_666  .      1_555  N
  Ca        O2        C                 96.00(7)     -3_655  .      1_555  N

# Information for phase 2
data_24314_LIJ_phase_2

_pd_block_id
  2006-12-29T15:03|24314_LIJ_phase2|El'ad_Caspi||

# Histograms for phase 2
loop_   _pd_block_diffractogram_id
  2006-12-29T15:03|24314_LIJ_H_01|El'ad_Caspi|SEPD

#==============================================================================
# 7. CHEMICAL, STRUCTURAL AND CRYSTAL DATA

_pd_char_particle_morphology      ?

_chemical_name_systematic
; ?
;
_chemical_name_common             ?
_chemical_formula_moiety          ?
_chemical_formula_structural      ?
_chemical_formula_analytical      ?
_chemical_melting_point           ?
_chemical_compound_source         ?       # for minerals and
                                          # natural products
_symmetry_space_group_name_Hall   ?

_exptl_crystal_F_000               ?
_exptl_crystal_density_diffrn      ?
_exptl_crystal_density_meas        ?
_exptl_crystal_density_method      ?

_cell_measurement_temperature     ?

_cell_special_details
; ?
;

_geom_special_details             ?

# The following item identifies the program(s) used (if appropriate).
_computing_structure_solution     ?

#==============================================================================

# 8. Phase information from GSAS

_pd_phase_name                         "Vanadium sample can"
_cell_length_a                         3.0287(6)
_cell_length_b                         3.0287
_cell_length_c                         3.0287
_cell_angle_alpha                      90.0
_cell_angle_beta                       90.0
_cell_angle_gamma                      90.0
_cell_volume                           27.783(17)
_symmetry_cell_setting                 cubic
_symmetry_space_group_name_H-M         "I m 3 m"
loop_ _symmetry_equiv_pos_site_id _symmetry_equiv_pos_as_xyz
       1 +x,+y,+z 
       2 +z,+x,+y 
       3 +y,+z,+x 
       4 +x,+y,-z 
       5 -z,+x,+y 
       6 +y,-z,+x 
       7 -z,+x,-y 
       8 -y,-z,+x 
       9 +y,-z,-x 
      10 -x,+y,-z 
      11 -z,-x,+y 
      12 +x,-y,-z 
      13 +y,+x,+z 
      14 +z,+y,+x 
      15 +x,+z,+y 
      16 +y,+x,-z 
      17 -z,+y,+x 
      18 +x,-z,+y 
      19 -z,+y,-x 
      20 -x,-z,+y 
      21 +x,-z,-y 
      22 -y,+x,-z 
      23 -z,-y,+x 
      24 +y,-x,-z 
      -1 -x,-y,-z 
      -2 -z,-x,-y 
      -3 -y,-z,-x 
      -4 -x,-y,+z 
      -5 +z,-x,-y 
      -6 -y,+z,-x 
      -7 +z,-x,+y 
      -8 +y,+z,-x 
      -9 -y,+z,+x 
     -10 +x,-y,+z 
     -11 +z,+x,-y 
     -12 -x,+y,+z 
     -13 -y,-x,-z 
     -14 -z,-y,-x 
     -15 -x,-z,-y 
     -16 -y,-x,+z 
     -17 +z,-y,-x 
     -18 -x,+z,-y 
     -19 +z,-y,+x 
     -20 +x,+z,-y 
     -21 -x,+z,+y 
     -22 +y,-x,+z 
     -23 +z,+y,-x 
     -24 -y,+x,+z 
     101 +x+1/2,+y+1/2,+z+1/2 
     102 +z+1/2,+x+1/2,+y+1/2 
     103 +y+1/2,+z+1/2,+x+1/2 
     104 +x+1/2,+y+1/2,-z+1/2 
     105 -z+1/2,+x+1/2,+y+1/2 
     106 +y+1/2,-z+1/2,+x+1/2 
     107 -z+1/2,+x+1/2,-y+1/2 
     108 -y+1/2,-z+1/2,+x+1/2 
     109 +y+1/2,-z+1/2,-x+1/2 
     110 -x+1/2,+y+1/2,-z+1/2 
     111 -z+1/2,-x+1/2,+y+1/2 
     112 +x+1/2,-y+1/2,-z+1/2 
     113 +y+1/2,+x+1/2,+z+1/2 
     114 +z+1/2,+y+1/2,+x+1/2 
     115 +x+1/2,+z+1/2,+y+1/2 
     116 +y+1/2,+x+1/2,-z+1/2 
     117 -z+1/2,+y+1/2,+x+1/2 
     118 +x+1/2,-z+1/2,+y+1/2 
     119 -z+1/2,+y+1/2,-x+1/2 
     120 -x+1/2,-z+1/2,+y+1/2 
     121 +x+1/2,-z+1/2,-y+1/2 
     122 -y+1/2,+x+1/2,-z+1/2 
     123 -z+1/2,-y+1/2,+x+1/2 
     124 +y+1/2,-x+1/2,-z+1/2 
    -101 -x+1/2,-y+1/2,-z+1/2 
    -102 -z+1/2,-x+1/2,-y+1/2 
    -103 -y+1/2,-z+1/2,-x+1/2 
    -104 -x+1/2,-y+1/2,+z+1/2 
    -105 +z+1/2,-x+1/2,-y+1/2 
    -106 -y+1/2,+z+1/2,-x+1/2 
    -107 +z+1/2,-x+1/2,+y+1/2 
    -108 +y+1/2,+z+1/2,-x+1/2 
    -109 -y+1/2,+z+1/2,+x+1/2 
    -110 +x+1/2,-y+1/2,+z+1/2 
    -111 +z+1/2,+x+1/2,-y+1/2 
    -112 -x+1/2,+y+1/2,+z+1/2 
    -113 -y+1/2,-x+1/2,-z+1/2 
    -114 -z+1/2,-y+1/2,-x+1/2 
    -115 -x+1/2,-z+1/2,-y+1/2 
    -116 -y+1/2,-x+1/2,+z+1/2 
    -117 +z+1/2,-y+1/2,-x+1/2 
    -118 -x+1/2,+z+1/2,-y+1/2 
    -119 +z+1/2,-y+1/2,+x+1/2 
    -120 +x+1/2,+z+1/2,-y+1/2 
    -121 -x+1/2,+z+1/2,+y+1/2 
    -122 +y+1/2,-x+1/2,+z+1/2 
    -123 +z+1/2,+y+1/2,-x+1/2 
    -124 -y+1/2,+x+1/2,+z+1/2 

# ATOMIC COORDINATES AND DISPLACEMENT PARAMETERS


loop_
      _atom_site_type_symbol
      _atom_site_label
      _atom_site_fract_x
      _atom_site_fract_y
      _atom_site_fract_z
      _atom_site_occupancy
      _atom_site_thermal_displace_type
      _atom_site_U_iso_or_equiv
      _atom_site_symmetry_multiplicity
V 
V       0.0          0.0          0.0          1.0        Uiso   0.004(4)      2

loop_ _atom_type_symbol
      _atom_type_number_in_cell
                   V   2.0        
 
# If you change Z, be sure to change all 3 of the following
_chemical_formula_sum                  V
_chemical_formula_weight               50.94
_cell_formula_units_Z                  2

# MOLECULAR GEOMETRY

loop_
      _geom_bond_atom_site_label_1
      _geom_bond_atom_site_label_2
      _geom_bond_distance
      _geom_bond_site_symmetry_1
      _geom_bond_site_symmetry_2
      _geom_bond_publ_flag
  V         V                3.0287(6)  .      1_455  N
  V         V                3.0287(6)  .      1_545  N
  V         V                3.0287(6)  .      1_554  N
  V         V                3.0287(6)  .      1_556  N
  V         V                3.0287(6)  .      1_565  N
  V         V                3.0287(6)  .      1_655  N
  V         V                2.6230(4)  .    101_444  N
  V         V                2.6230(4)  .    101_445  N
  V         V                2.6230(4)  .    101_454  N
  V         V                2.6230(4)  .    101_455  N
  V         V                2.6230(4)  .    101_544  N
  V         V                2.6230(4)  .    101_545  N
  V         V                2.6230(4)  .    101_554  N
  V         V                2.6230(4)  .    101_555  N

loop_
      _geom_angle_atom_site_label_1
      _geom_angle_atom_site_label_2
      _geom_angle_atom_site_label_3
      _geom_angle
      _geom_angle_site_symmetry_1
      _geom_angle_site_symmetry_2
      _geom_angle_site_symmetry_3
      _geom_angle_publ_flag
  V         V         V               70.529(15)    101_444  .    101_445  N
  V         V         V                70.529(8)    101_444  .    101_454  N
  V         V         V               109.471(8)    101_444  .    101_455  N
  V         V         V                70.529(8)    101_444  .    101_544  N
  V         V         V               109.471(8)    101_444  .    101_545  N
  V         V         V              109.471(15)    101_444  .    101_554  N
  V         V         V                 179.9802    101_444  .    101_555  N
  V         V         V               109.471(8)    101_445  .    101_454  N
  V         V         V                70.529(8)    101_445  .    101_455  N
  V         V         V               109.471(8)    101_445  .    101_544  N
  V         V         V                70.529(8)    101_445  .    101_545  N
  V         V         V                  179.972    101_445  .    101_554  N
  V         V         V              109.471(15)    101_445  .    101_555  N
  V         V         V               70.529(15)    101_454  .    101_455  N
  V         V         V              109.471(15)    101_454  .    101_544  N
  V         V         V                  179.972    101_454  .    101_545  N
  V         V         V                70.529(8)    101_454  .    101_554  N
  V         V         V               109.471(8)    101_454  .    101_555  N
  V         V         V                  179.972    101_455  .    101_544  N
  V         V         V              109.471(15)    101_455  .    101_545  N
  V         V         V               109.471(8)    101_455  .    101_554  N
  V         V         V                70.529(8)    101_455  .    101_555  N
  V         V         V               70.529(15)    101_544  .    101_545  N
  V         V         V                70.529(8)    101_544  .    101_554  N
  V         V         V               109.471(8)    101_544  .    101_555  N
  V         V         V               109.471(8)    101_545  .    101_554  N
  V         V         V                70.529(8)    101_545  .    101_555  N
  V         V         V               70.529(15)    101_554  .    101_555  N

# Powder diffraction data for histogram  1
data_24314_LIJ_p_01

_pd_block_id
  2006-12-29T15:03|24314_LIJ_H_01|El'ad_Caspi|SEPD
#==============================================================================
# 9. INSTRUMENT CHARACTERIZATION

_exptl_special_details
; ?
;

# if regions of the data are excluded, the reason(s) are supplied here:
_pd_proc_info_excluded_regions
; ?
;

# The following item is used to identify the equipment used to record
# the powder pattern when the diffractogram was measured at a laboratory
# other than the authors' home institution, e.g. when neutron or synchrotron
# radiation is used.

_pd_instr_location
; ?
;
_pd_calibration_special_details           # description of the method used
                                          # to calibrate the instrument
; ?
;

_diffrn_ambient_temperature       ?
_diffrn_source                    ?
_diffrn_source_target             ?
_diffrn_source_type               ?
_diffrn_measurement_device_type   ?
_diffrn_detector                  ?
_diffrn_detector_type             ?       # make or model of detector

_pd_meas_scan_method              ?       # options are 'step', 'cont',
                                          # 'tof', 'fixed' or
                                          # 'disp' (= dispersive)
_pd_meas_special_details
;  ?
;

# The following two items identify the program(s) used (if appropriate).
_computing_data_collection        ?
_computing_data_reduction         ?

# Describe any processing performed on the data, prior to refinement.
# For example: a manual Lp correction or a precomputed absorption correction
_pd_proc_info_data_reduction      ?

# The following item is used for angular dispersive measurements only.

_diffrn_radiation_monochromator   ?

# The following items are used to define the size of the instrument.
# Not all distances are appropriate for all instrument types.

_pd_instr_dist_src/mono           ?
_pd_instr_dist_mono/spec          ?
_pd_instr_dist_src/spec           ?
_pd_instr_dist_spec/anal          ?
_pd_instr_dist_anal/detc          ?
_pd_instr_dist_spec/detc          ?

# 10. Specimen size and mounting information

# The next three fields give the specimen dimensions in mm.  The equatorial
# plane contains the incident and diffracted beam.

_pd_spec_size_axial               ?       # perpendicular to
                                          # equatorial plane

_pd_spec_size_equat               ?       # parallel to
                                          # scattering vector
                                          # in transmission

_pd_spec_size_thick               ?       # parallel to
                                          # scattering vector
                                          # in reflection

_pd_spec_mounting                         # This field should be
                                          # used to give details of the
                                          # container.
; ?
;

_pd_spec_mount_mode               ?       # options are 'reflection'
                                          # or 'transmission'

_pd_spec_shape                    ?       # options are 'cylinder'
                                          # 'flat_sheet' or 'irregular'

# phase table
loop_     _pd_phase_id
          _pd_phase_block_id
          _pd_phase_mass_%
          _pd_proc_ls_profile_function
          _pd_proc_ls_peak_cutoff
  1  2006-12-29T15:03|24314_LIJ_phase1|El'ad_Caspi||
           55.3
;
 TOF Profile function number 3 with  21 terms
 Profile coefficients for exponential pseudovoigt
  convolution Von Dreele, 1990 (unpublished)
 #1 (alp  ) =   0.6666 #2 (bet-0) = 0.038000 #3 (bet-1) = 0.009837
 #4 (sig-0) =      0.0 #5 (sig-1) =     56.3 #6 (sig-2) =      0.0
 #7 (gam-0) =     0.00 #8 (gam-1) =    12.20 #9 (gam-2) =     0.00
 #10(gsf  ) =     0.00 #11(g1ec ) =     0.00 #12(g2ec ) =     0.00
 #13(rstr ) =    0.000 #14(rsta ) =    0.000 #15(rsca ) =    0.000
 #16(L11)   =    0.040 #17(L22)   =    0.066 #18(L33)   =    0.000
 #19(L12)   =   -0.091 #20(L13)   =    0.059 #21(L23)   =   -0.032
 Peak tails are ignored  where the intensity is below 0.0020 times the peak
   Aniso. broadening axis   0.0   0.0   1.0
;
           0.00200
  2  2006-12-29T15:03|24314_LIJ_phase2|El'ad_Caspi||
           44.7(30)
;
 TOF Profile function number 3 with  21 terms
 Profile coefficients for exponential pseudovoigt
  convolution Von Dreele, 1990 (unpublished)
 #1 (alp  ) =   0.6666 #2 (bet-0) = 0.038001 #3 (bet-1) = 0.009837
 #4 (sig-0) =      0.0 #5 (sig-1) =     58.4 #6 (sig-2) =      0.0
 #7 (gam-0) =     0.00 #8 (gam-1) =     0.00 #9 (gam-2) =     0.00
 #10(gsf  ) =     0.00 #11(g1ec ) =     0.00 #12(g2ec ) =     0.00
 #13(rstr ) =    0.000 #14(rsta ) =    0.000 #15(rsca ) =    0.000
 #16(L11)   =    0.000 #17(L22)   =    0.000 #18(L33)   =    0.000
 #19(L12)   =    0.000 #20(L13)   =    0.000 #21(L23)   =    0.000
 Peak tails are ignored  where the intensity is below 0.0020 times the peak
   Aniso. broadening axis   0.0   0.0   1.0
;
           0.00200

loop_ _atom_type_symbol
      _atom_type_scat_length_neutron
      _atom_type_scat_source
  Ca   0.4700
  International_Tables_Vol_C
  C   0.6646
  International_Tables_Vol_C
  V  -0.0443
  International_Tables_Vol_C
  O   0.5803
  International_Tables_Vol_C
_diffrn_radiation_probe                neutron
_pd_proc_ls_prof_R_factor              0.0265
_pd_proc_ls_prof_wR_factor             0.0353
_pd_proc_ls_prof_wR_expected           0.0298
_refine_ls_R_Fsqd_factor               0.07967

_pd_proc_ls_background_function
;   GSAS Background function number 1 with 16 terms.
 Shifted Chebyshev function of 1st kind
      1:   0.122485     2:  -1.212110E-02 3:   7.200520E-03 4:  -5.196020E-03
      5:   1.104500E-02 6:   4.344200E-03 7:   1.478780E-03 8:  -2.299940E-03
      9:  -1.026800E-0310:   3.393590E-0311:   2.494620E-0312:  -5.731410E-05
     13:  -7.449990E-0514:   1.502280E-0315:   3.445020E-0316:   5.038330E-04
;

_exptl_absorpt_process_details
;   GSAS Absorption/surface roughness correction: function number 1
 Linear absorption correction
Term =     0.61819E-01
Correction is refined.
;
_exptl_absorpt_correction_T_min        0.67073
_exptl_absorpt_correction_T_max        0.96233
# Extinction correction
_pd_proc_info_datetime                 2006-12-29T15:03:28
_pd_calc_method                        "Rietveld Refinement"
_pd_meas_2theta_fixed                  144.000

#---- raw/calc data loop -----
